# Supplementary material for: A biocompatible serine functionalized nanostructured zirconia based biosensing platform for non-invasive oral cancer detection
Source: Royal Society of Chemistry journal article supplement (doi:10.1039/c6ra07392a), 2016-01-01
Supplement: c6ra07392a1.pdf [file c6ra07392a1.pdf]

## Supporting Information

### **Biocompatible Serine Functionalized Nanostructured Zirconia Based Biosensing Platform for Non-invasive Oral Cancer Detection**

Suveen Kumar, Jai Gopal Sharma, Sagar Maji and Bansi Dhar Malhotra\*

Nanobioelectronics Laboratory, Department of Biotechnology, Delhi Technological University, Delhi 110042, India.

\*Corresponding Author: [bansi.malhotra@gmail.com](mailto:bansi.malhotra@gmail.com)

## Scheme, Figures and Tables Captions

**Scheme S1:** Schematic diagram of functionalization of Zirconia with (a) APTES and (b) serine molecules.

**Figure S1:** FT-IR spectrum of the serine amino acid.

**Figure S2:** Electrochemical response of BSA/anti-CYFRA-21-1/serine/nZrO<sub>2</sub>/ITO immunoelectrodes with various pH of PBS buffer containing 5 mM [Fe(CN)<sub>6</sub>]<sup>3-/4-</sup>.

**Figure S3:** Cyclic voltammetry response of ITO, serine/nZrO<sub>2</sub>/ITO, anti-CYFRA-21-1/serine/nZrO<sub>2</sub>/ITO and BSA/anti-CYFRA-21-1/serine/nZrO<sub>2</sub>/ITO electrode.

**Figure S4:** Scan rate studies of serine/nZrO<sub>2</sub>/ITO [Inset (a) magnitude of oxidation and reduction current generated as response of scan rate (mV/s), Inset (b) potential as function of scan rate] electrodes.

**Figure S5:** Scan rate studies of BSA/anti-CYFRA-21-1/serine/nZrO<sub>2</sub>/ITO [Inset (a) magnitude of oxidation and reduction current generated as a function of scan rate (mV/s), Inset (b) potential as function of scan rate] electrode.

**Figure S6:** Response time studies for binding of CYFRA-21-1 with BSA/anti-CYFRA-21-1/serine/nZrO<sub>2</sub>/ITO immunoelectrode.

**Figure S7:** Interferents studies of BSA/anti-CYFRA-21-1/serine/nZrO<sub>2</sub>/ITO immunoelectrode in presence of various molecules present in saliva sample of oral cancer patients.

**Figure S8:** Cumulative Effects of ions present in artificial saliva on electrochemical response study of BSA/anti-CYFRA-21-1/serine/nZrO<sub>2</sub>/ITO immunoelectrode.

**Figure S9:** Electrochemical response studies of five different BSA/anti-CYFRA-21-1/serine/nZrO<sub>2</sub>/ITO immunoelectrodes (fabricated in same condition) as function of 0.01 ng mL<sup>-1</sup> concentration of CYFRA-21-1.

**Figure S10:** Shelf life studies of BSA/anti-CYFRA-21-1/serine/nZrO<sub>2</sub>/ITO immunoelectrodes.

**Table S1:** Determination of CYFRA-21-1 concentration in saliva samples using BSA/anti-CYFRA-21-1/serine/nZrO<sub>2</sub>/ITO immunoelectrodes

**Scheme S1:**

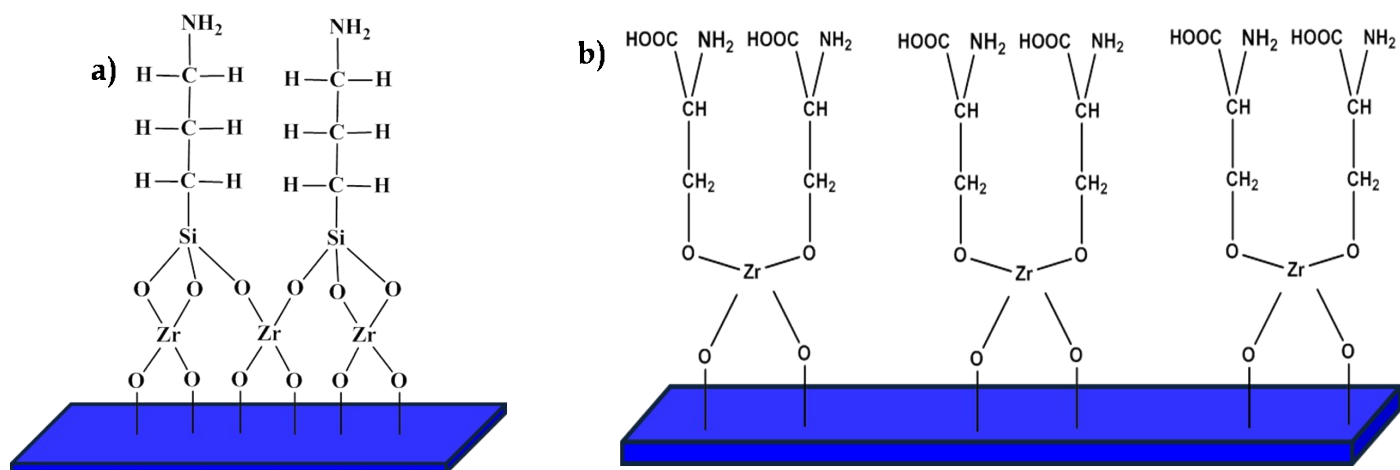

**Figure S1:**

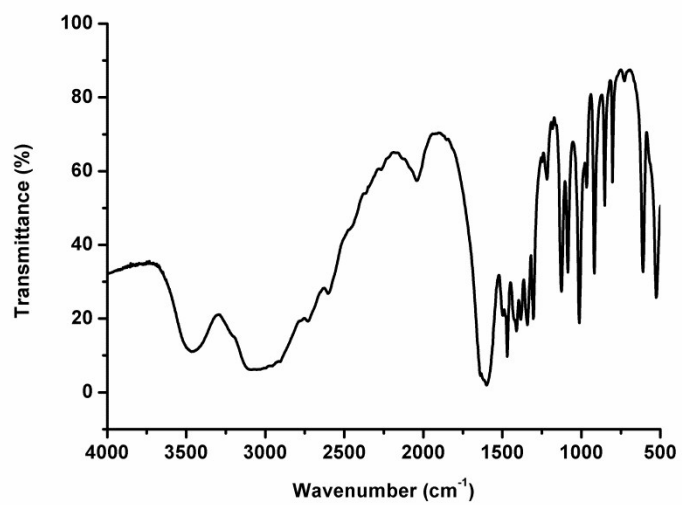

Figure S2:

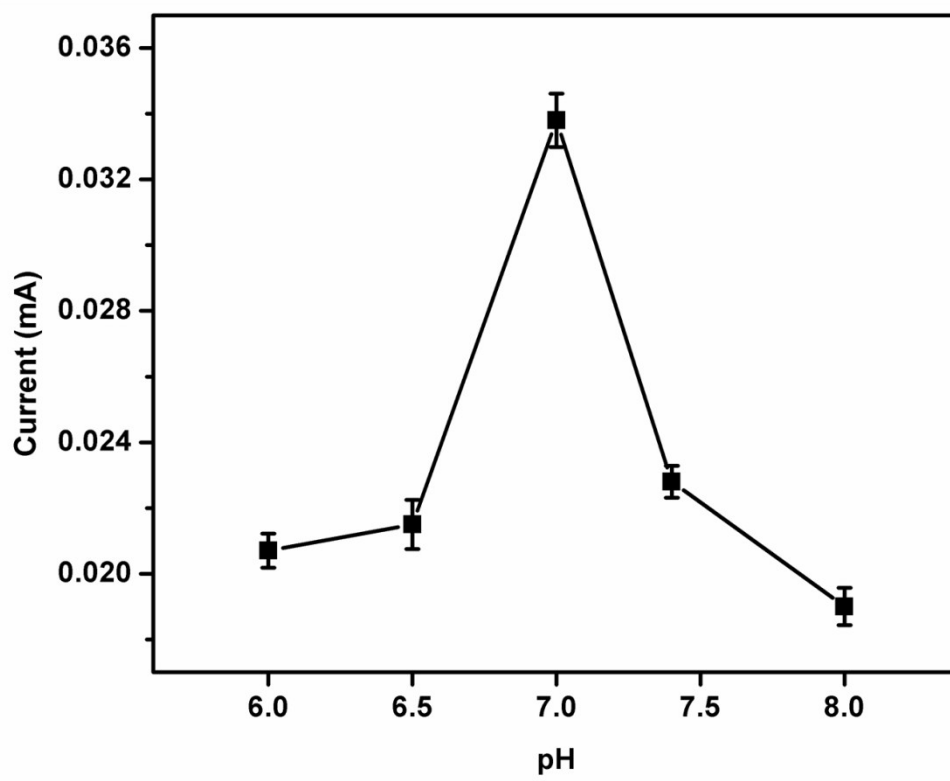

Figure S3:

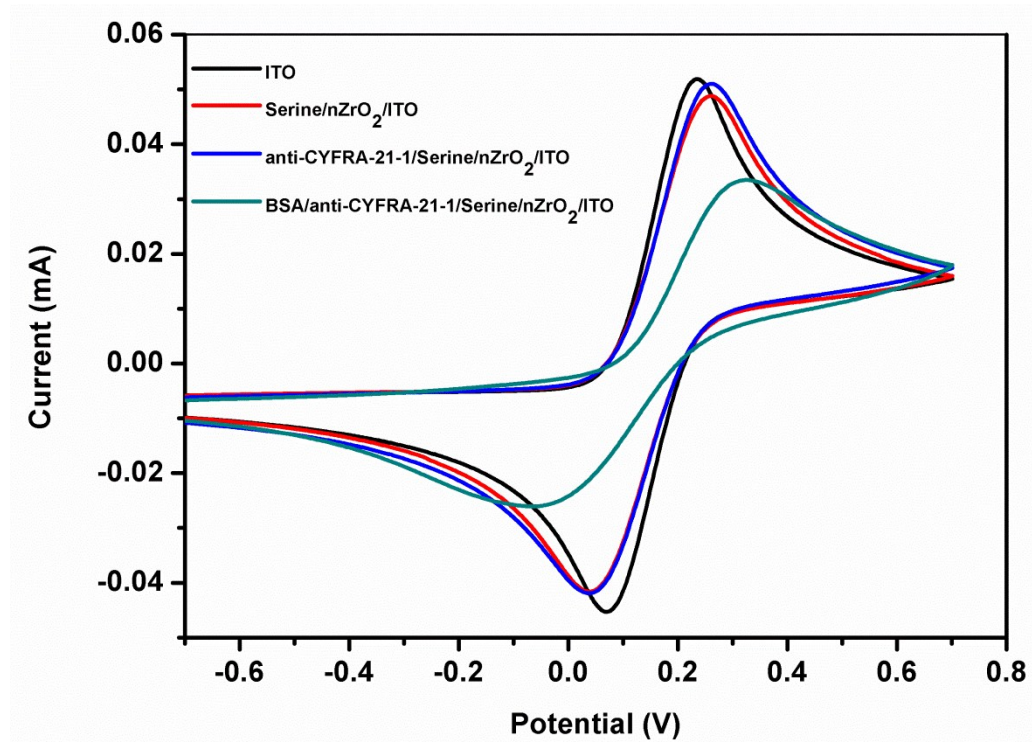

Figure S4:

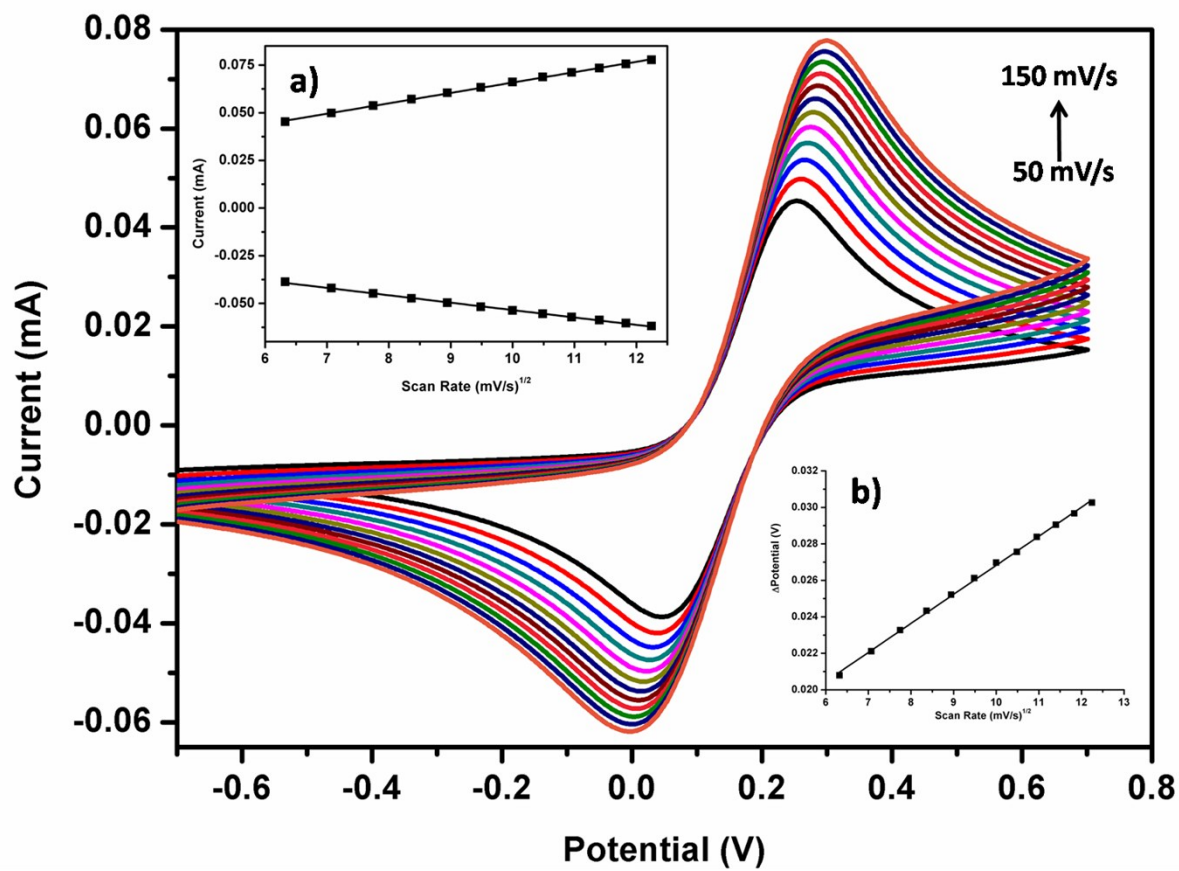

Figure S5:

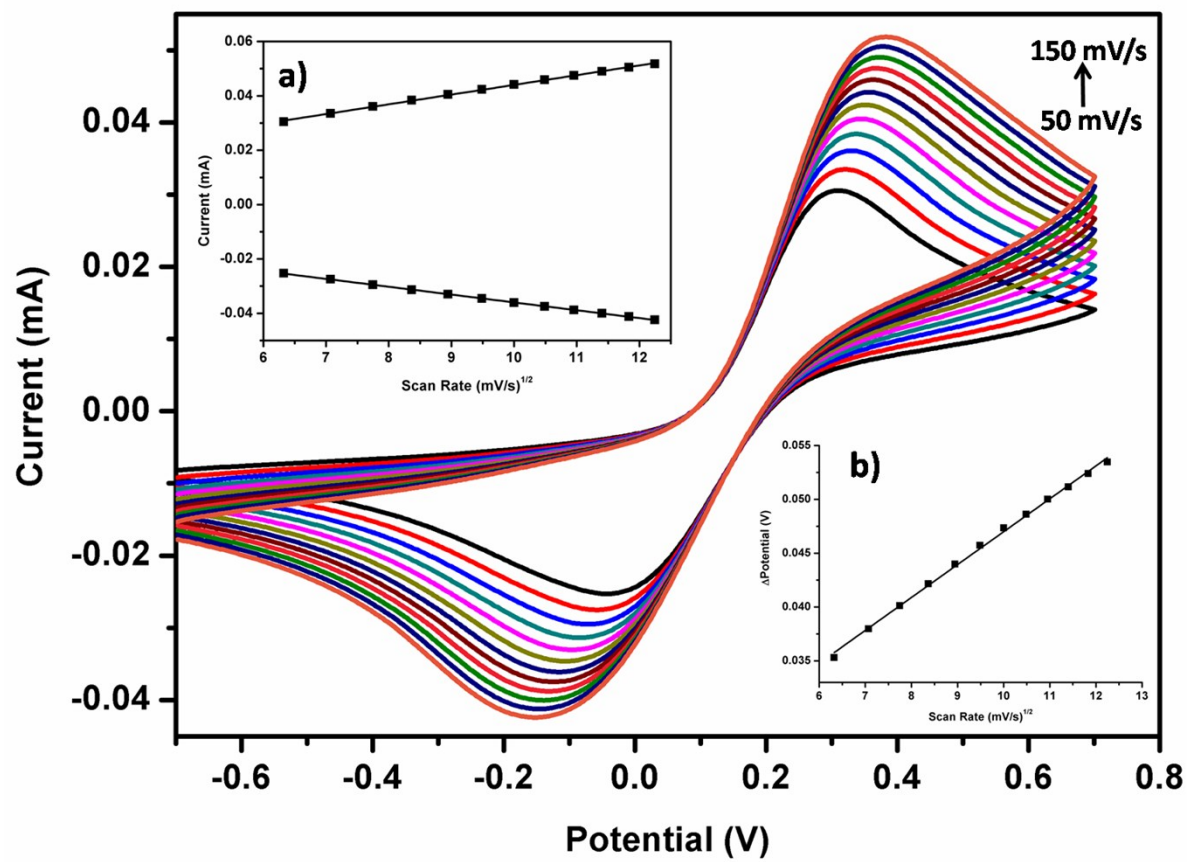



Figure S6:

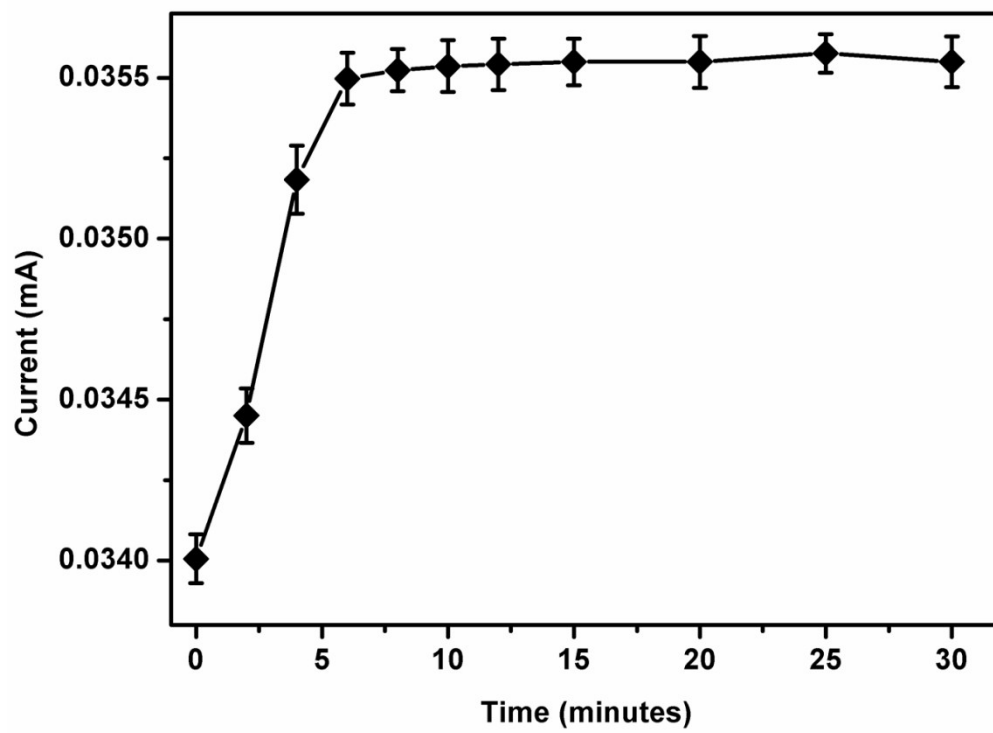

Figure S7:

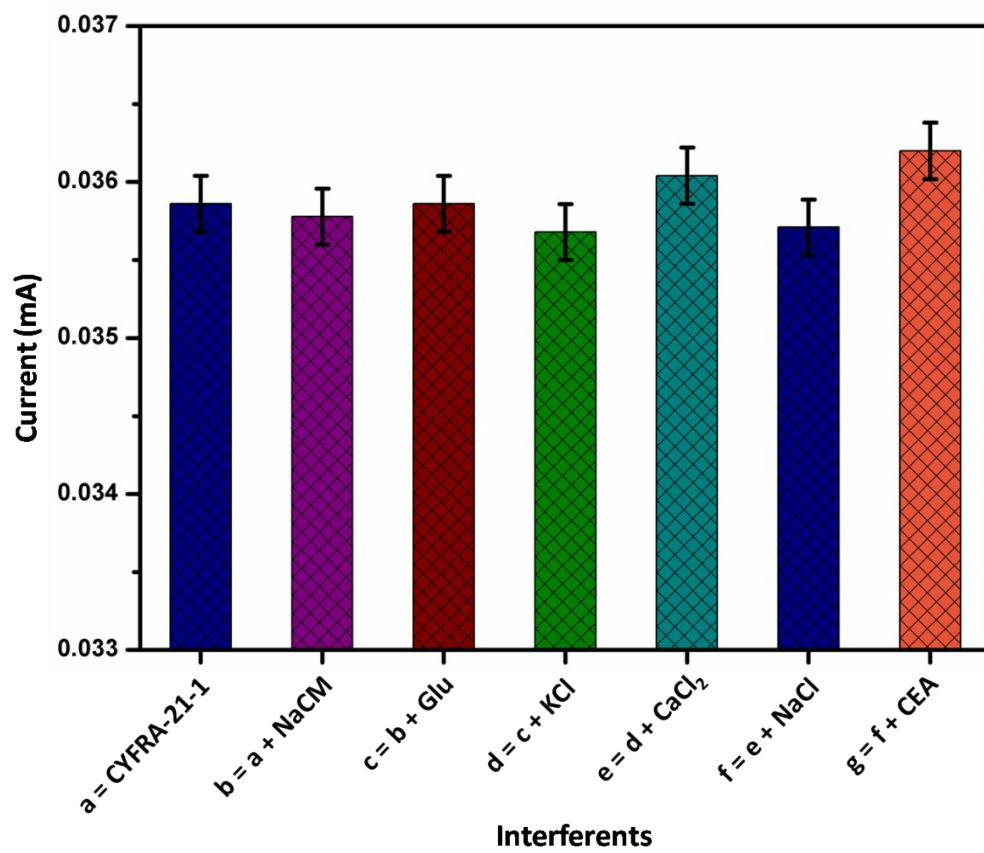

Figure S8:

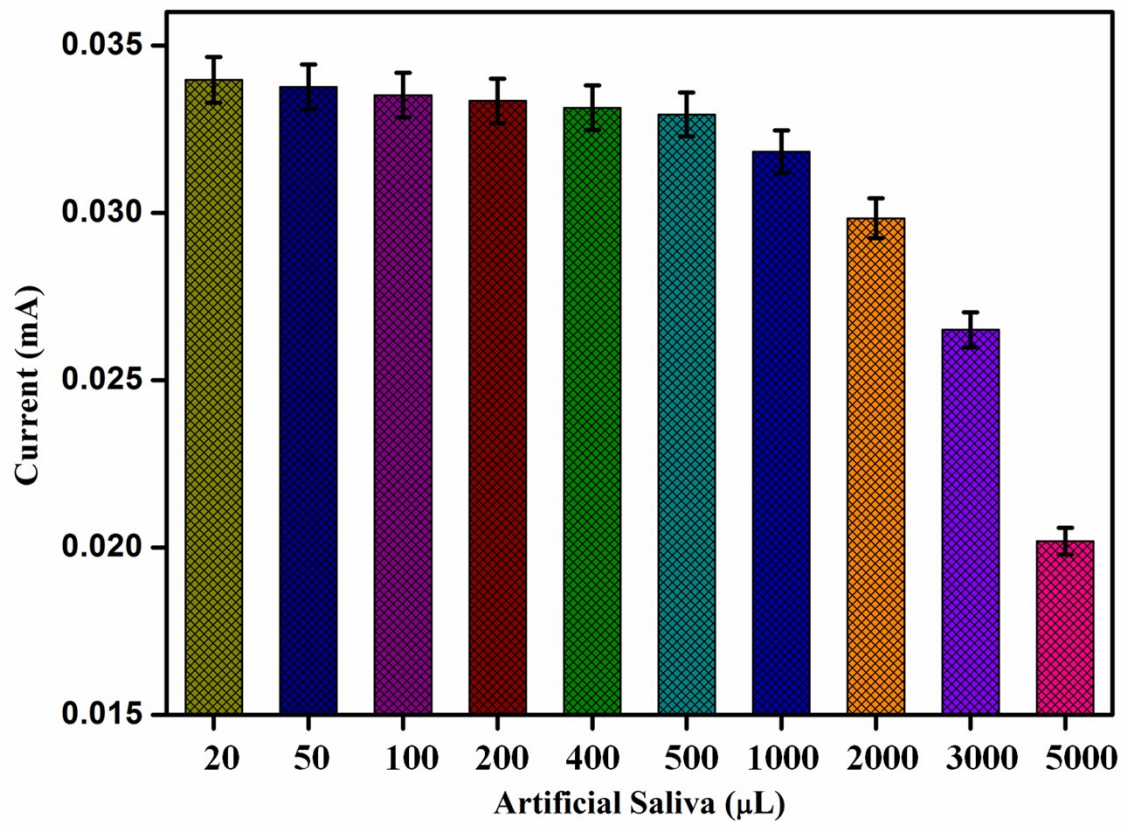

Figure S9:

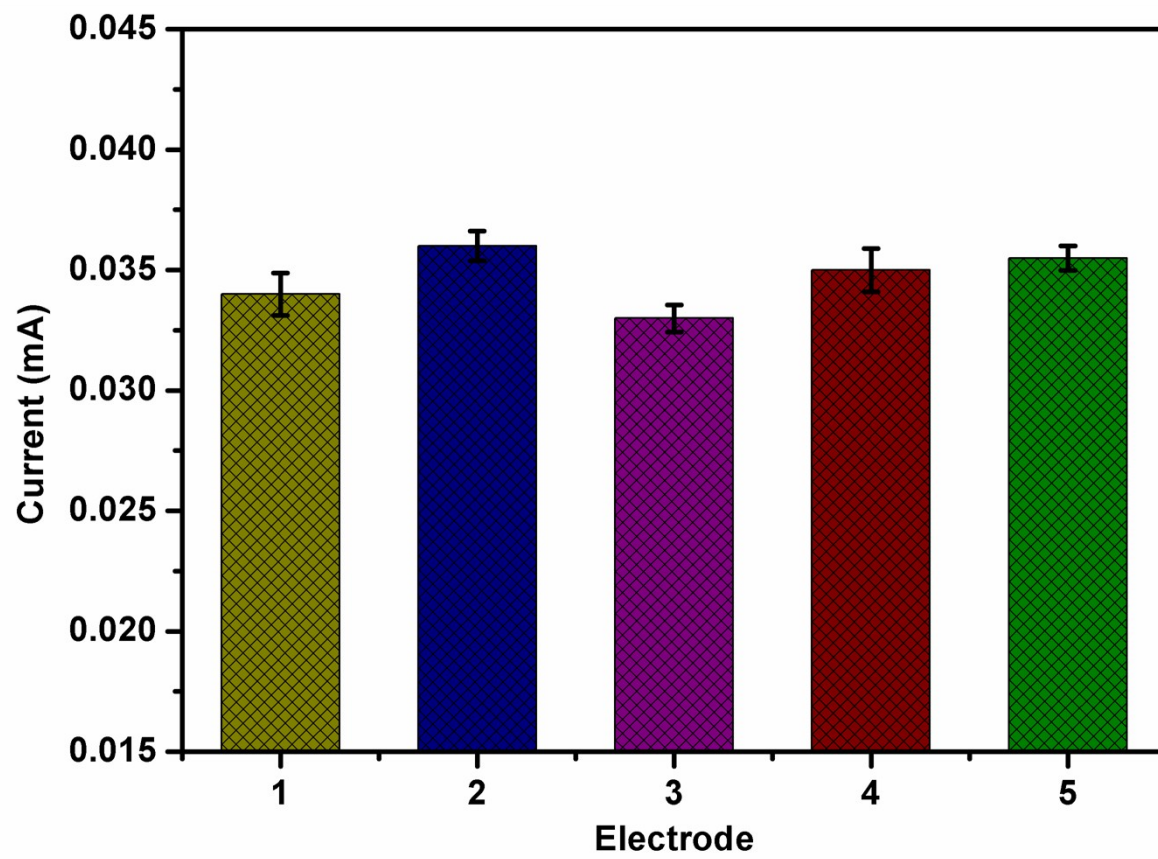

Figure S10:

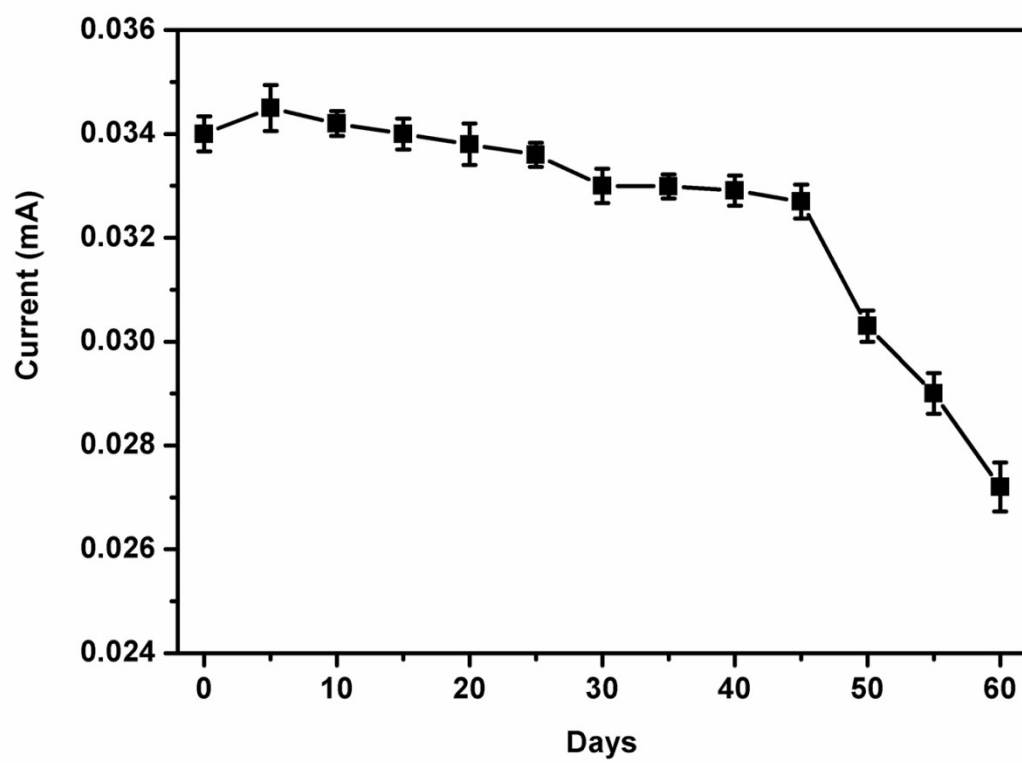

**Table S1:**

| <b>S. No.</b> | <b>CYFRA-21-1 concentration determined using ELISA (in ng mL<sup>-1</sup>)</b> | <b>Peak current (mA) obtained for standard CYFRA-21-1 samples</b> | <b>Peak current samples (mA) obtained with in Patients saliva samples</b> | <b>% RSD</b> |
|---------------|--------------------------------------------------------------------------------|-------------------------------------------------------------------|---------------------------------------------------------------------------|--------------|
| 1.            | 13.35                                                                          | 0.0458                                                            | 0.0440                                                                    | 2.83         |
| 2.            | 14.15                                                                          | 0.0461                                                            | 0.0480                                                                    | 2.86         |
| 3.            | 12.10                                                                          | 0.0454                                                            | 0.0445                                                                    | 1.42         |
| 4.            | 14.55                                                                          | 0.0461                                                            | 0.0490                                                                    | 4.31         |
| 5.            | 12.50                                                                          | 0.0456                                                            | 0.0400                                                                    | 9.25         |
| 6.            | 13.50                                                                          | 0.0458                                                            | 0.0420                                                                    | 6.12         |
| 7.            | 15.55                                                                          | 0.0464                                                            | 0.0491                                                                    | 4.00         |
